# Supplementary material for: Adding ferrous ions improved the performance of contaminant removal from low C/N coastal wastewater in constructed wetlands
Source: Royal Society of Chemistry journal article supplement (doi:10.1039/d0ew00223b), 2020-01-01
Supplement: d0ew00223b1.pdf [file d0ew00223b1.pdf]

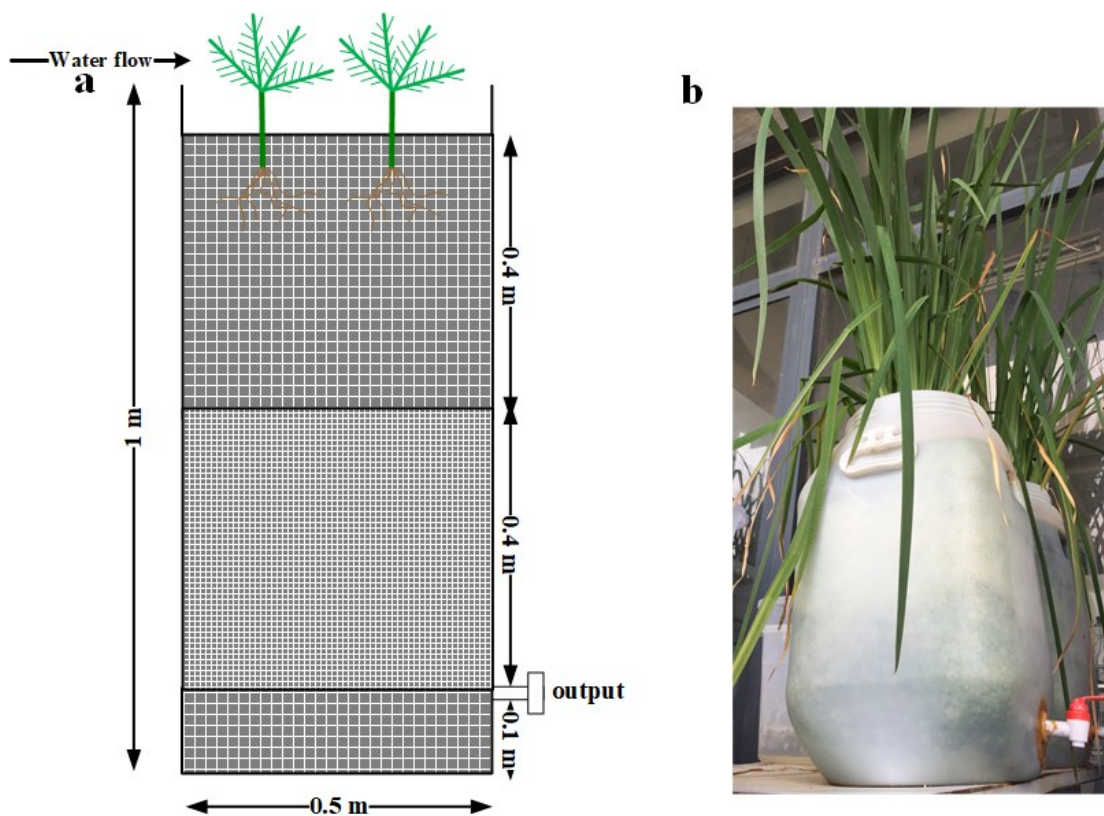

**Fig. S1** The sketch and real product of CWs: (a) sketch (b) real product

**Table S1** Condition of bacteria taxa in all treatments in Stage 1

| system | nrfA   |       |       |        |       |        |       |       |        |       |
|--------|--------|-------|-------|--------|-------|--------|-------|-------|--------|-------|
|        | Phylum | Class | Order | Family | Genus | Phylum | Class | Order | Family | Genus |
| CK1    | 34     | 95    | 134   | 246    | 393   | 4      | 8     | 13    | 14     | 22    |
| CW-0.2 | 32     | 81    | 123   | 199    | 312   | 4      | 8     | 14    | 14     | 23    |
| CW-0.5 | 35     | 105   | 156   | 262    | 422   | 4      | 8     | 14    | 15     | 22    |
| CW-0.8 | 27     | 73    | 128   | 201    | 298   | 4      | 8     | 13    | 15     | 21    |
| CW-1   | 34     | 100   | 143   | 245    | 426   | 4      | 8     | 13    | 14     | 21    |

**Table S2** Biodiversity indexes of bacteria in all treatments in Stage 1

| system | V4 region |         |         |         | nrfA    |         |         |         |
|--------|-----------|---------|---------|---------|---------|---------|---------|---------|
|        | chao1     | ACE     | simpson | shannon | chao1   | ACE     | simpson | shannon |
| CK1    | 2227.00   | 2227.00 | 0.99    | 9.37    | 1655.03 | 1655.03 | 0.98    | 7.90    |
| CW-0.2 | 2214.00   | 2214.00 | 0.99    | 9.15    | 1260.37 | 1266.62 | 0.99    | 7.84    |
| CW-0.5 | 2218.00   | 2218.00 | 0.99    | 9.03    | 1425.61 | 1454.61 | 0.99    | 8.27    |
| CW-0.8 | 1930.00   | 1930.00 | 0.98    | 8.51    | 1260.04 | 1289.46 | 0.99    | 7.92    |
| CW-1   | 2538.73   | 2730.60 | 0.90    | 7.21    | 1349.00 | 1349.00 | 0.99    | 8.40    |
